# Supplementary material
Source: PubMed Central journal article supplement (PMC8036906)
Supplement: NIHMS1553322-supplement-Supplementary_Tables.pdf [file NIHMS1553322-supplement-Supplementary_Tables.pdf]

## SUPPLEMENTARY DATA

For an article in the *Journal of American Academy of Dermatology*, accepted September 3, 2019

A regimen to minimize pain during blue light photodynamic therapy of actinic keratoses:  
Bilaterally controlled, randomized trial of simultaneous versus conventional illumination

Urvashi Kaw, MD<sup>1</sup>; Muneeb Ilyas<sup>1</sup>, DO; Taylor Bullock, BS<sup>1</sup>; Lisa Rittwage, BSN RN<sup>1</sup>; Margo Riha, BSN RN<sup>1</sup>; Allison Vidimos, MD MPH<sup>1</sup>; Bo Hu, PhD<sup>2</sup>; Christine B. Warren, MD MS<sup>1</sup>;  
Edward V. Maytin, MD PhD<sup>1, 3</sup>

<sup>1</sup> Departments of Dermatology, and <sup>2</sup>Quantitative Health Sciences, Cleveland Clinic, 9500 Euclid Avenue, Cleveland, OH 44195

<sup>3</sup> Corresponding author: Edward V. Maytin, MD PhD, Desk A60, Cleveland Clinic, 9500 Euclid Avenue, Cleveland, OH 44195 E-mail: [maytine@ccf.org](mailto:maytine@ccf.org)

### CONTENTS:

- Supplem. Table 1.** Patient demographics, bilateral AK lesion counts at baseline (Visit 1), and absolute and relative changes in AK lesion counts at 3 months after treatment (Visit 2) on the side receiving either Simultaneous (S) or Conventional (C) PDT.
- Supplem. Table 2.** Pain scores reported during simultaneous *versus* conventional PDT illumination.
- Supplem. Table 3.** Inflammatory responses during the first four days after photodynamic therapy; Comparison between sides receiving Simultaneous PDT or Conventional PDT
- Supplem. Table 4.** Results of an ancillary trial to evaluate the effect of ALA and ambient light upon facial actinic keratoses (AK) in nine patients.

**SUPPLEMENTARY TABLE 1.**

Patient demographics, bilateral AK lesion counts at baseline (Visit 1), and absolute and relative changes in AK lesion counts at 3 months after treatment (Visit 2) on the side receiving either Simultaneous (S) or Conventional (C) PDT.

| Demographic information |        |          | Number of AK Lesions on the Face |                  |         |    |                           |    |                             |    | Number of AK Lesions on the Scalp |    |         |    |            |    |              |    |    |
|-------------------------|--------|----------|----------------------------------|------------------|---------|----|---------------------------|----|-----------------------------|----|-----------------------------------|----|---------|----|------------|----|--------------|----|----|
| Patient ID              | Sex    | Age (Yr) | Visit 1                          |                  | Visit 2 |    | Absol Decr <sup>[c]</sup> |    | Rel Decr <sup>[d]</sup> (%) |    | Visit 1                           |    | Visit 2 |    | Absol Decr |    | Rel Decr (%) |    |    |
|                         |        |          | S <sup>[a]</sup>                 | C <sup>[b]</sup> | S       | C  | S                         | C  | S                           | C  | S                                 | C  | S       | C  | S          | C  | S            | C  |    |
| (1)                     | 30b-18 | F        | 73                               | 14               | 10      | 5  | 2                         | 9  | 8                           | 64 | 80                                | 0  | 0       | 0  | 0          | -  | -            | -  | -  |
| (2)                     | 30b-17 | M        | 72                               | 24               | 26      | 11 | 14                        | 13 | 12                          | 54 | 46                                | 14 | 20      | 10 | 10         | 4  | 10           | 29 | 50 |
| (3)                     | 30-04  | M        | 87                               | 27               | 10      | 6  | 5                         | 21 | 5                           | 78 | 50                                | 44 | 18      | 13 | 9          | 31 | 9            | 70 | 50 |
| (4)                     | 30-03  | M        | 70                               | 56               | 49      | 30 | 24                        | 26 | 25                          | 46 | 51                                | 0  | 0       | 0  | 0          | -- | -            | -  | -  |
| (5)                     | 30b-16 | M        | 71                               | 29               | 17      | 17 | 7                         | 12 | 10                          | 41 | 59                                | 0  | 0       | 0  | 0          | -- | -            | -  | -  |
| (6)                     | 30-05  | M        | 73                               | 21               | 16      | 14 | 7                         | 7  | 9                           | 33 | 56                                | 11 | 9       | 7  | 5          | 4  | 4            | 36 | 44 |
| (7)                     | 30b-29 | M        | 88                               | 32               | 38      | 9  | 16                        | 23 | 22                          | 72 | 58                                | 59 | 64      | 25 | 41         | 34 | 23           | 58 | 36 |
| (8)                     | 45b-19 | M        | 73                               | 27               | 28      | 15 | 10                        | 12 | 18                          | 44 | 64                                | 13 | 12      | 5  | 10         | 8  | 2            | 62 | 17 |
| (9)                     | 45-06  | M        | 58                               | 9                | 10      | 1  | 1                         | 8  | 9                           | 89 | 90                                | 16 | 22      | 11 | 11         | 5  | 11           | 31 | 50 |
| (10)                    | 45b-20 | M        | 74                               | 23               | 16      | 8  | 10                        | 15 | 6                           | 65 | 38                                | 59 | 66      | 38 | 45         | 21 | 21           | 36 | 32 |
| (11)                    | 45-10  | M        | 61                               | 13               | 7       | 1  | 3                         | 12 | 4                           | 92 | 57                                | 13 | 13      | 8  | 8          | 5  | 5            | 38 | 38 |
| (12)                    | 45-07  | M        | 72                               | 7                | 16      | 6  | 2                         | 1  | 14                          | 14 | 88                                | 0  | 0       | 0  | 0          | -- | -            | -  | -  |
| (13)                    | 45-08  | M        | 58                               | 15               | 13      | 10 | 9                         | 5  | 4                           | 33 | 31                                | 24 | 10      | 18 | 6          | 6  | 4            | 25 | 40 |
| (14)                    | 45b-21 | M        | 66                               | 26               | 23      | 14 | 14                        | 12 | 9                           | 46 | 7                                 | 51 | 46      | 28 | 28         | 23 | 18           | 45 | 64 |
| (15)                    | 45b-23 | M        | 69                               | 19               | 17      | 1  | 1                         | 18 | 16                          | 95 | 94                                | 0  | 0       | 0  | 0          | -- | -            | -  | -  |
| (16)                    | 60-12  | M        | 74                               | 13               | 10      | 6  | 5                         | 7  | 5                           | 54 | 50                                | 10 | 10      | 4  | 5          | 6  | 5            | 60 | 50 |
| (17)                    | 60-15  | M        | 76                               | 20               | 11      | 5  | 1                         | 4  | 10                          | 44 | 91                                | 11 | 7       | 6  | 5          | 5  | 2            | 45 | 29 |
| (18)                    | 60-14  | M        | 69                               | 7                | 2       | 3  | 2                         | 4  | 0                           | 57 | 0                                 | 12 | 13      | 4  | 3          | 8  | 10           | 67 | 77 |
| (19)                    | 60-13  | M        | 72                               | 17               | 27      | 14 | 14                        | 3  | 13                          | 18 | 48                                | 0  | 0       | 0  | 0          | -- | -            | -  | -  |
| (20)                    | 60-11  | M        | 70                               | 7                | 13      | 3  | 1                         | 4  | 12                          | 57 | 92                                | 13 | 13      | 8  | 8          | 5  | 5            | 38 | 38 |
| (21)                    | 60b-24 | M        | 63                               | 16               | 17      | 2  | 7                         | 14 | 10                          | 88 | 59                                | 25 | 31      | 20 | 24         | 5  | 7            | 20 | 23 |
| (22)                    | 60b-25 | M        | 66                               | 9                | 18      | 4  | 6                         | 5  | 12                          | 56 | 67                                | 27 | 22      | 16 | 15         | 11 | 7            | 41 | 32 |
| (23)                    | 60b-26 | F        | 50                               | 53               | 24      | 4  | 4                         | 25 | 20                          | 86 | 83                                | 0  | 0       | 0  | 0          | -- | -            | -  | -  |

**FOOTNOTES:**

- [a] Side of the body that received Simultaneous incubation/illumination (S).
- [b] Side of the body that received Conventional incubation (1 h) followed by illumination (C).
- [c] Absolute decrease in AK lesion counts.
- [d] Relative decrease in AK lesion counts with respect to baseline (%).

**SUPPLEMENTARY TABLE 2.**

Pain scores reported during simultaneous *versus* conventional PDT illumination.

| <i>Patient ID</i> | <i>Simultaneous PDT Side</i>   |     |     |     |     |             | <i>Conventional PDT side</i>   |     |     |             |
|-------------------|--------------------------------|-----|-----|-----|-----|-------------|--------------------------------|-----|-----|-------------|
|                   | Time during illumination (min) |     |     |     |     |             | Time during illumination (min) |     |     |             |
|                   | 10'                            | 20' | 30' | 40' | 50' | <i>Mean</i> | 5'                             | 10' | 15' | <i>Mean</i> |
| (1) 30b-18        | 0                              | 0   | 0   | -   | -   | <b>0.0</b>  | 5                              | 5   | 4   | <b>4.7</b>  |
| (2) 30b-17        | 0                              | 0   | 0   | -   | -   | <b>0.0</b>  | 2                              | 1   | 0   | <b>1.0</b>  |
| (3) 30-04         | 2                              | 2   | 2   | -   | -   | <b>2.0</b>  | 10                             | 7   | 5   | <b>7.3</b>  |
| (4) 30-03         | 3                              | 5   | 6   | -   | -   | <b>4.7</b>  | 10                             | 5   | 6   | <b>7.0</b>  |
| (5) 30b-16        | 0                              | 1   | 1   | -   | -   | <b>0.7</b>  | 4                              | 4   | 4   | <b>4.0</b>  |
| (6) 30-05         | 1                              | 1   | 1   | -   | -   | <b>1.0</b>  | 5                              | 3   | 1   | <b>3.0</b>  |
| (7) 30b-29        | 0                              | 0   | 0   | -   | -   | <b>0.0</b>  | 3                              | 3   | 3   | <b>3.0</b>  |
| (8) 45b-19        | 0                              | 0   | 0   | 0   | -   | <b>0.0</b>  | 8                              | 3   | 0   | <b>3.7</b>  |
| (9) 45-06         | 1                              | 0   | 0   | 0   | -   | <b>0.3</b>  | 4                              | 3   | 2   | <b>3.0</b>  |
| (10) 45b-20       | 1                              | 1   | 1   | 1   | -   | <b>1.0</b>  | 3                              | 3   | 2   | <b>2.7</b>  |
| (11) 45-10        | 0                              | 0   | 0   | 0   | -   | <b>0.0</b>  | 2                              | 2   | 1   | <b>1.7</b>  |
| (12) 45-07        | 0                              | 0   | 0   | 1   | -   | <b>0.3</b>  | 4                              | 4   | 3   | <b>3.7</b>  |
| (13) 45-08        | 0                              | 0   | 0   | 0   | -   | <b>0.0</b>  | 4                              | 5   | 4   | <b>4.3</b>  |
| (14) 45b-21       | 1                              | 1   | 0   | 0   | -   | <b>0.5</b>  | 5                              | 5   | 5   | <b>5.0</b>  |
| (15) 45b-23       | 0                              | 0   | 0   | 0   | -   | <b>0.0</b>  | 1                              | 1   | 2   | <b>1.3</b>  |
| (16) 60-12        | 0                              | 0   | 0   | 0   | 0   | <b>0.0</b>  | 1                              | 1   | 0   | <b>0.7</b>  |
| (17) 60-15        | 1                              | 0   | 1   | 1   | 1   | <b>0.8</b>  | 8                              | 6   | 5   | <b>6.3</b>  |
| (18) 60-14        | 0                              | 0   | 0   | 0   | 1   | <b>0.2</b>  | 5                              | 4   | 4   | <b>4.3</b>  |
| (19) 60-13        | 0                              | 0   | 0   | 0   | 0   | <b>0.0</b>  | 1                              | 1   | 1   | <b>1.0</b>  |
| (20) 60-11        | 0                              | 0   | 0   | 0   | 0   | <b>0.0</b>  | 4                              | 4   | 3   | <b>3.7</b>  |
| (21) 60b-24       | 0                              | 1   | 1   | 1   | 1   | <b>0.8</b>  | 8                              | 7   | 5   | <b>6.7</b>  |
| (22) 60b-25       | 0                              | 0   | 0   | 0   | 0   | <b>0.0</b>  | 0                              | 1   | 0   | <b>0.3</b>  |
| (23) 60b-26       | 0                              | 0   | 0   | 0   | 0   | <b>0.0</b>  | 2                              | 4   | 5   | <b>3.7</b>  |

**FOOTNOTES:**

- Pain values shown here were reported every 5 to 10 minutes on a 0-to-10 visual-analog scale (VAS). The highest value of 10 was defined as unbearable pain.
- Statistical comparison of VAS pain scores between simultaneous and conventional regimens showed the following: The mean score on Side A was **0.52** (95% CI=[0, 1.09]), and on Side B was **3.57** (95% CI=[2.97, 4.16]). The two sides were significantly different, with a p-value <0.001.

**SUPPLEMENTARY TABLE 3.**

Inflammatory responses reported during the first 4 days after photodynamic therapy:

Comparison between the sides receiving Simultaneous PDT or Conventional PDT

| <b>Symptom</b> <sup>[c]</sup>        | <b>DAY 1</b>                                        | <b>DAY 2</b>           | <b>DAY 3</b>           | <b>DAY 4</b>           |
|--------------------------------------|-----------------------------------------------------|------------------------|------------------------|------------------------|
|                                      | <b>Simult <sup>[a]</sup>   Conven<sup>[b]</sup></b> | <b>Simult   Conven</b> | <b>Simult   Conven</b> | <b>Simult   Conven</b> |
| <b>(A) Bleeding</b>                  | 0   0                                               | 17   0                 | 13   4                 | 17   13                |
| <b>(B) Blisters</b>                  | 13   13                                             | 4   9                  | 17   13                | 4   9                  |
| <b>(C) Burning</b>                   | 65   65                                             | 52   52                | 35   35                | 26   26                |
| <b>(D) Crusting</b>                  | 9   4                                               | 9   17                 | 30   26                | 35   35                |
| <b>(E) Itching</b>                   | 43   43                                             | 74   74                | 70   65                | 65   65                |
| <b>(F) Open sores</b>                | 0   0                                               | 9   9                  | 9   9                  | 4   4                  |
| <b>(G) Peeling</b>                   | 4   0                                               | 4   9                  | 22   26                | 48   52                |
| <b>(H) Redness</b>                   | 91   91                                             | 100   100              | 91   87                | 83   74                |
| <b>(I) Stinging</b>                  | 65   65                                             | 70   70                | 39   39                | 35   35                |
| <b>(J) Swelling</b>                  | 26   22                                             | 26   26                | 9   13                 | 0   0                  |
| <b>(K) Pain Score</b> <sup>[d]</sup> |                                                     |                        |                        |                        |
| Mean:                                | 3.0   2.9                                           | 2.5   2.4              | 1.6   1.5              | 1.0   1.0              |
| SEM:                                 | ± 0.64   ± 0.62                                     | ± 0.53   ± 0.51        | ± 0.33   ± 0.31        | ± 0.22   ± 0.21        |

**FOOTNOTES:**

<sup>[a]</sup> *Simult* refers to the side of the body that received *Simultaneous* ALA incubation and blue light illumination (Side A).

<sup>[b]</sup> *Conven* refers to the side of the body that received the *Conventional* PDT regimen with a 1 hr ALA preincubation prior to blue light illumination (Side B).

<sup>[c]</sup> Each value in the table is a percentage of patients who reported the particular symptom (**A** to **J**).

<sup>[d]</sup> Average pain score (0-10 visual-analog scale) reported by the 23 patients, on Side A and Side B.

**SUPPLEMENTARY TABLE 4.**

Results of an ancillary trial to evaluate the effect of ALA and ambient light upon facial actinic keratoses (AK) in nine patients.

| Pt # | Study ID | Sex | Age (Yr) | Month* | <i>Number of AK Lesions on the Face</i> |         |                 |         |
|------|----------|-----|----------|--------|-----------------------------------------|---------|-----------------|---------|
|      |          |     |          |        | Absolute Counts                         |         | Rel. Change (%) |         |
|      |          |     |          |        | Visit 1                                 | Visit 2 |                 | (Diff)  |
| 1    | A30      | M   | 73       | Jun    | 17                                      | 16      | -1              | - 5.9%  |
| 2    | A32      | F   | 68       | Feb    | 49                                      | 45      | -4              | - 8.2%  |
| 3    | A37      | M   | 70       | Feb    | 123                                     | 109     | -14             | - 11.4% |
| 4    | A36      | M   | 73       | Feb    | 19                                      | 15      | -4              | - 21.1% |
| 5    | A35      | F   | 69       | Feb    | 33                                      | 23      | -10             | - 30.3% |
| 6    | A34      | M   | 74       | Feb    | 6                                       | 4       | -2              | - 33.3% |
| 7    | A33      | M   | 70       | Mar    | 12                                      | 8       | -4              | - 33.3% |
| 8    | A38      | M   | 81       | Apr    | 27                                      | 17      | -10             | - 37.0% |
| 9    | A39 **   | M   | 76       | Apr    | 19                                      | 38      | 19              | +100.0% |

**FOOTNOTES:**

Nine subjects with AK on the face were recruited for this small ancillary study to examine the possible treatment effect that ambient light may exert upon AK lesions after ALA application, in the absence of any blue light exposure. At Visit 1 the AK lesions were marked, photographed, and counted. Topical ALA was applied to the face but no blue light illumination was performed. Instead, patients were sent home with a hat after instructing them to avoid sunlight and bright indoor lights for 48 h. These are the same instructions typically given to PDT patients in a real world setting. At a second study visit three months later (Visit 2), AK lesions were again evaluated by photography and clinical examination. Most patients participated in this study during the winter/spring of 2018 (February-April).

As shown in the table, all but one patient had a decline in the AK lesion count between Visit 1 and Visit 2. For the eight patients who showed a reduction in their lesion counts, the average decrease in the number of AK (mean ± SD) was 22.6 ± 12.6%. Overall, the mean change in AK lesion count for all nine patients was -8.9%.

\* Time of year when the ALA was applied
